# Supplementary material for: Reducing cardiovascular risk with immunomodulators: a randomised active comparator trial among patients with rheumatoid arthritis
Source: PubMed Central journal article supplement — Ann Rheum Dis. 2022 Nov 30;82(3):324–30. doi: 10.1136/ard-2022-223302 (PMC9933165; doi:10.1136/ard-2022-223302), 2022-11-30
Supplement: ard-2022-223302supp001.pdf [file ard-2022-223302supp001.pdf]

## **Reducing Cardiovascular Risk with Immunomodulators: A Single Blind Randomized Active Comparator Trial Among Patients with Rheumatoid Arthritis**

### **Supplemental Material**

Supplementary Methods: Separate Files

- A. Statistical Analysis Plan
- B. FDG PET/CT Vascular Image Assessment

Supplementary Table 1: Detailed Eligibility Criteria

Supplementary Figure 1: Study Schema

Supplementary Table 2: Comparison of Subjects Included in the Final Analysis with those Excluded

Supplementary Figure 2: CONSORT Diagram

Supplementary Table 3: Main Outcome Results Based on Different Definitions of Adherence

Supplementary Figure 3: Rheumatoid Arthritis Disease Activity Changes Across the Treatment Groups

Supplementary Table 4: Main Outcome Results Based on Changes in Rheumatoid Arthritis Disease Activity

Supplementary Table 5: Glucocorticoid Use at Baseline and During Follow-up

**Supplementary Table 1: Detailed Eligibility Criteria  
(Subjects who met all of the following criteria at screening were eligible for enrollment into the study)**

| <b>Inclusion</b>                                                                                                                                                                                                                                                                                                                                                                                                                                                                                                                                                                                                                                                                                                                                                                                                                                                                                                                                                                                                                                                                                                                                                                                                                                                                                                                                                                                                                                                                                                                                                                                                                                                                                                                                                               |
|--------------------------------------------------------------------------------------------------------------------------------------------------------------------------------------------------------------------------------------------------------------------------------------------------------------------------------------------------------------------------------------------------------------------------------------------------------------------------------------------------------------------------------------------------------------------------------------------------------------------------------------------------------------------------------------------------------------------------------------------------------------------------------------------------------------------------------------------------------------------------------------------------------------------------------------------------------------------------------------------------------------------------------------------------------------------------------------------------------------------------------------------------------------------------------------------------------------------------------------------------------------------------------------------------------------------------------------------------------------------------------------------------------------------------------------------------------------------------------------------------------------------------------------------------------------------------------------------------------------------------------------------------------------------------------------------------------------------------------------------------------------------------------|
| <ul style="list-style-type: none"> <li>• Written informed consent signed by the subject;</li> <li>• Fulfill ACR/EULAR 2010 criteria for RA;</li> <li>• Men <math>\geq</math> 45 years and women <math>\geq</math> 50 years of age;</li> <li>• Methotrexate for <math>\geq</math> 8 weeks at <math>\geq</math> 15mg weekly or on at least 7.5mg of methotrexate weekly for <math>\geq</math>8 weeks with a documented intolerance of higher methotrexate doses, and on a stable dose for the previous 4 weeks;</li> <li>• DAS28 score <math>&gt;</math> 3.2;</li> <li>• Able to swallow pills;</li> <li>• Males and females with reproductive potential must agree to practice effective measures of birth control;</li> <li>• If taking prednisone (or equivalent corticosteroid), the dose must be <math>\leq</math> 10 mg/day at the time of the baseline FDG PET/CT scan and must NOT change by more than <math>\pm</math>3.0 mg for the four weeks prior to the baseline FDG PET/CT;</li> <li>• If taking a low- or moderate-intensity statin, the dose must be stable for six weeks prior to screening and must not change during the six months of the trial (please see Statins and PCSK9 Inhibitors below in Exclusions for further details);</li> <li>• Willing to comply with all study procedures and be available for the duration of the study;</li> <li>• Rheumatoid arthritis diagnosis without psoriasis or with psoriasis if rheumatoid factor <math>\geq</math> 2x upper limit of normal or anti-CCP <math>\geq</math> 2x upper limit of normal.</li> </ul>                                                                                                                                                                                                  |
| <b>Exclusion</b>                                                                                                                                                                                                                                                                                                                                                                                                                                                                                                                                                                                                                                                                                                                                                                                                                                                                                                                                                                                                                                                                                                                                                                                                                                                                                                                                                                                                                                                                                                                                                                                                                                                                                                                                                               |
| <ul style="list-style-type: none"> <li>• Prior use of biologic DMARD or small molecule DMARD (i.e. tofacitinib) in the past 6 months, use of Rituximab ever;</li> <li>• If a subject is considered to be an etanercept (Enbrel) or adalimumab (Humira) failure by their primary rheumatologist;</li> <li>• Non-biologic DMARDs other than methotrexate or hydroxychloroquine for two months prior to screening;</li> <li>• Current use or use within the past 12 months of a high-intensity statin lipid lowering drug (atorvastatin/Lipitor 40-80mg, rosuvastatin/Crestor <math>&gt;</math>10mg) or a PCSK9 inhibitor (alirocumab/Praluent, Evolocumab/Repatha, or Bococizumab);</li> <li>• Prior patient reported, physician diagnosed clinical CV event: myocardial infarction or heart attack, angina, stroke, uncompensated or severe heart failure (NYHA class III or IV), prior vascular procedure (coronary artery angioplasty or stenting, carotid endarterectomy, coronary artery bypass surgery);</li> <li>• Demyelinating disease;</li> <li>• Any of the following forms of arthritis that may otherwise explain the subject's RA symptoms: psoriatic arthritis, reactive arthritis, juvenile idiopathic arthritis, ankylosing spondylitis, polymyalgia rheumatica</li> <li>• Any of the following other autoimmune and/or chronic inflammatory diseases: Inflammatory Bowel Disease, Crohn's disease, Cutaneous or Systemic Lupus, Systemic Vasculitis, Giant Cell Arteritis, Polymyositis, Dermatomyositis, Sarcoidosis, or Scleroderma;</li> <li>• Transient ischemic attack;</li> <li>• Revascularization for peripheral artery disease;</li> <li>• Cancer treated in last five years (except basal and squamous cell) or any lymphoma or melanoma;</li> </ul> |

- Type I diabetes mellitus or type II diabetes mellitus treated with insulin or uncontrolled with HbA1c  $\geq 7\%$ ;
- Known pregnancy, HIV, hepatitis B, hepatitis C, active (or untreated latent) TB;
- Known sulfa allergy or other known hypersensitivity to any of the trial agents or G6PD deficiency;
- Known macular disease or known retinal disease;
- Baseline blood count, renal or liver abnormalities as follows: WBC  $< 3.5 \times 1000$  n/ul, Hematocrit  $< 30\%$ , Platelet count  $< 90 \times 1,000$  n/ul, estimated glomerular filtration rate  $< 50$  ml/min/1.7m<sup>2</sup>, AST  $> 60$  U/L, ALT  $> 84$  U/L;
- Intra-articular glucocorticoid injection within the 4 weeks prior to the potential baseline FDG PET/CT; and
- Two or more of the following high dose radiation scans in the past year: CT scan with contrast, angiogram, SPECT nuclear medicine scan, myocardial (cardiac) perfusion scan.

**Supplementary Figure 1: Study Schema**

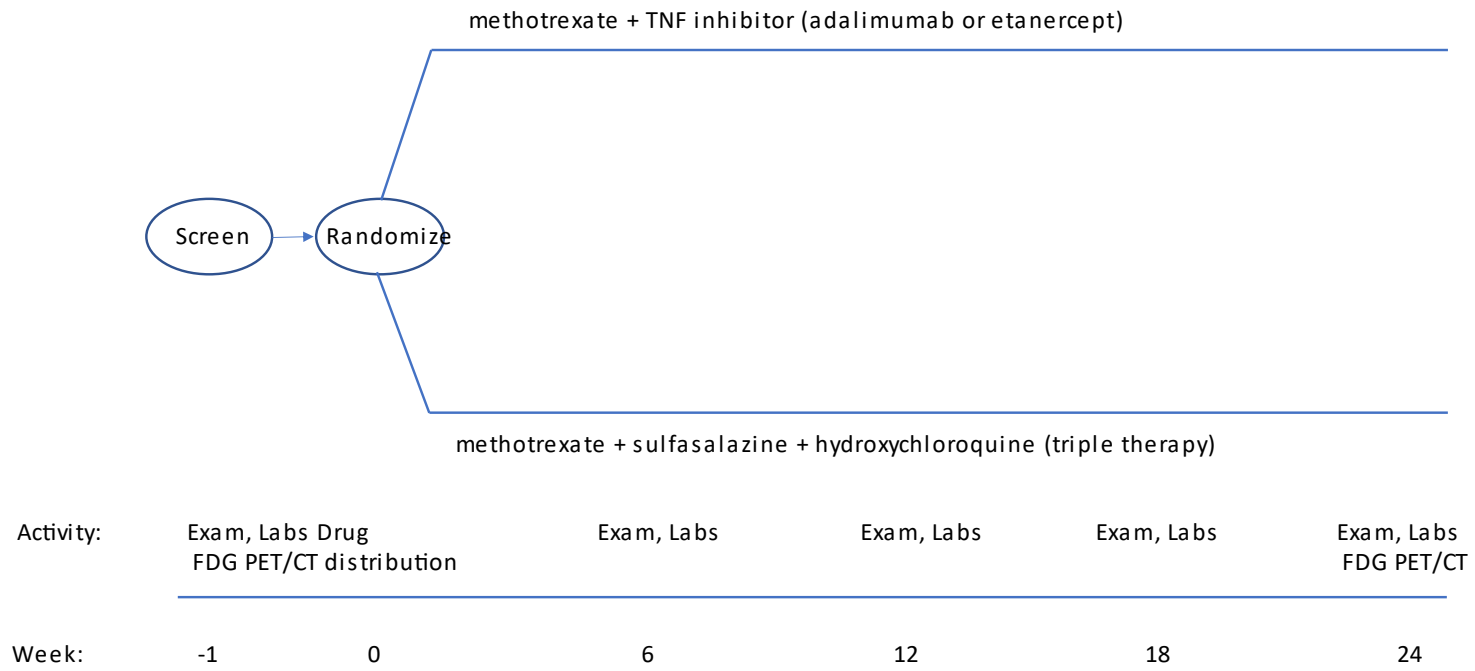

**Supplementary Table 2: Baseline Patient Characteristics of Patients Included in Final Analyses Versus Those Excluded**

|                                          | Included<br>(n = 115)                 | Excluded<br>(n = 44) | p-value |
|------------------------------------------|---------------------------------------|----------------------|---------|
|                                          | N (%) or median (interquartile range) |                      |         |
| Age, years                               | 58.0 (53.0, 65.0)                     | 59.5 (56.0, 65.0)    | 0.29    |
| Sex, female                              | 82 (71.3)                             | 37 (84.1)            | 0.096   |
| Race                                     |                                       |                      |         |
| White                                    | 90 (80.4)                             | 29 (72.5)            | 0.38    |
| Black                                    | 12 (10.7)                             | 8 (20.0)             |         |
| Other                                    | 10 (8.9)                              | 3 (7.5)              |         |
| Ethnicity                                |                                       |                      | 0.54    |
| Hispanic                                 | 31 (27.0)                             | 14 (31.8)            |         |
| Non-Hispanic                             | 84 (73.0)                             | 30 (68.2)            |         |
| RA disease duration, years               | 1.4 (0.5, 6.6)                        | 3.8 (0.8, 7.9)       | 0.16    |
| Serologic status, positive for RF or CCP | 63 (56.8)                             | 28 (68.3)            | 0.20    |
| DAS28-CRP                                | 4.8 (4.0, 5.6)                        | 5.1 (4.7, 5.5)       | 0.11    |
| hsCRP (mg/L)                             | 3.9 (1.6, 9.8)                        | 5.7 (1.7, 11.4)      | 0.50    |
| Glucocorticoid use, daily                | 38 (33.0)                             | 10 (22.7)            | 0.20    |
| NSAID use                                | 46 (40.0)                             | 16 (36.4)            | 0.67    |
| Aspirin use                              | 28 (24.4)                             | 11 (26.2)            | 0.75    |
| Methotrexate weekly dosage (mg)          | 20.0 (15.0, 25.0)                     | 20.0 (15.0, 25.0)    | 0.53    |
| Heath assessment questionnaire           | 1.1 (0.5, 1.8)                        | 1.4 (1.1, 2.1)       | 0.01    |
| Body mass index (kg/m <sup>2</sup> )     | 29.3 (25.7, 33.2)                     | 32.2 (27.9, 36.4)    | 0.01    |
| Hypertension                             | 52 (45.2)                             | 16 (38.1)            | 0.43    |
| Hyperlipidemia                           | 23 (20.0)                             | 6 (14.3)             | 0.40    |
| Diabetes mellitus                        | 2 (1.7)                               | 1 (2.3)              | 1.00    |
| Tobacco use                              |                                       |                      | 0.52    |
| Current                                  | 14 (12.2)                             | 3 (7.1)              |         |
| Past                                     | 30 (26.1)                             | 9 (21.4)             |         |
| Never                                    | 71 (61.7)                             | 30 (71.4)            |         |
| Statin use                               |                                       |                      | 0.37    |
| None                                     | 93 (80.9)                             | 38 (90.5)            |         |
| Low-moderate intensity                   | 20 (17.4)                             | 4 (9.5)              |         |
| High intensity                           | 2 (1.7)                               | 0 (0.0)              |         |
| At least one cardiovascular risk factor* | 63 (54.8)                             | 20 (47.6)            | 0.43    |

Notes: \*Cardiovascular risk factors include the presence of hypertension, diabetes, hyperlipidemia, or current tobacco use (all self-reported).

Abbreviations: RA, rheumatoid arthritis; hsCRP, high sensitivity C-reactive protein; NSAID, non-steroidal anti-inflammatory drugs.

### Supplementary Figure 2: CONSORT Diagram Demonstrating the Construction of the Trial Population

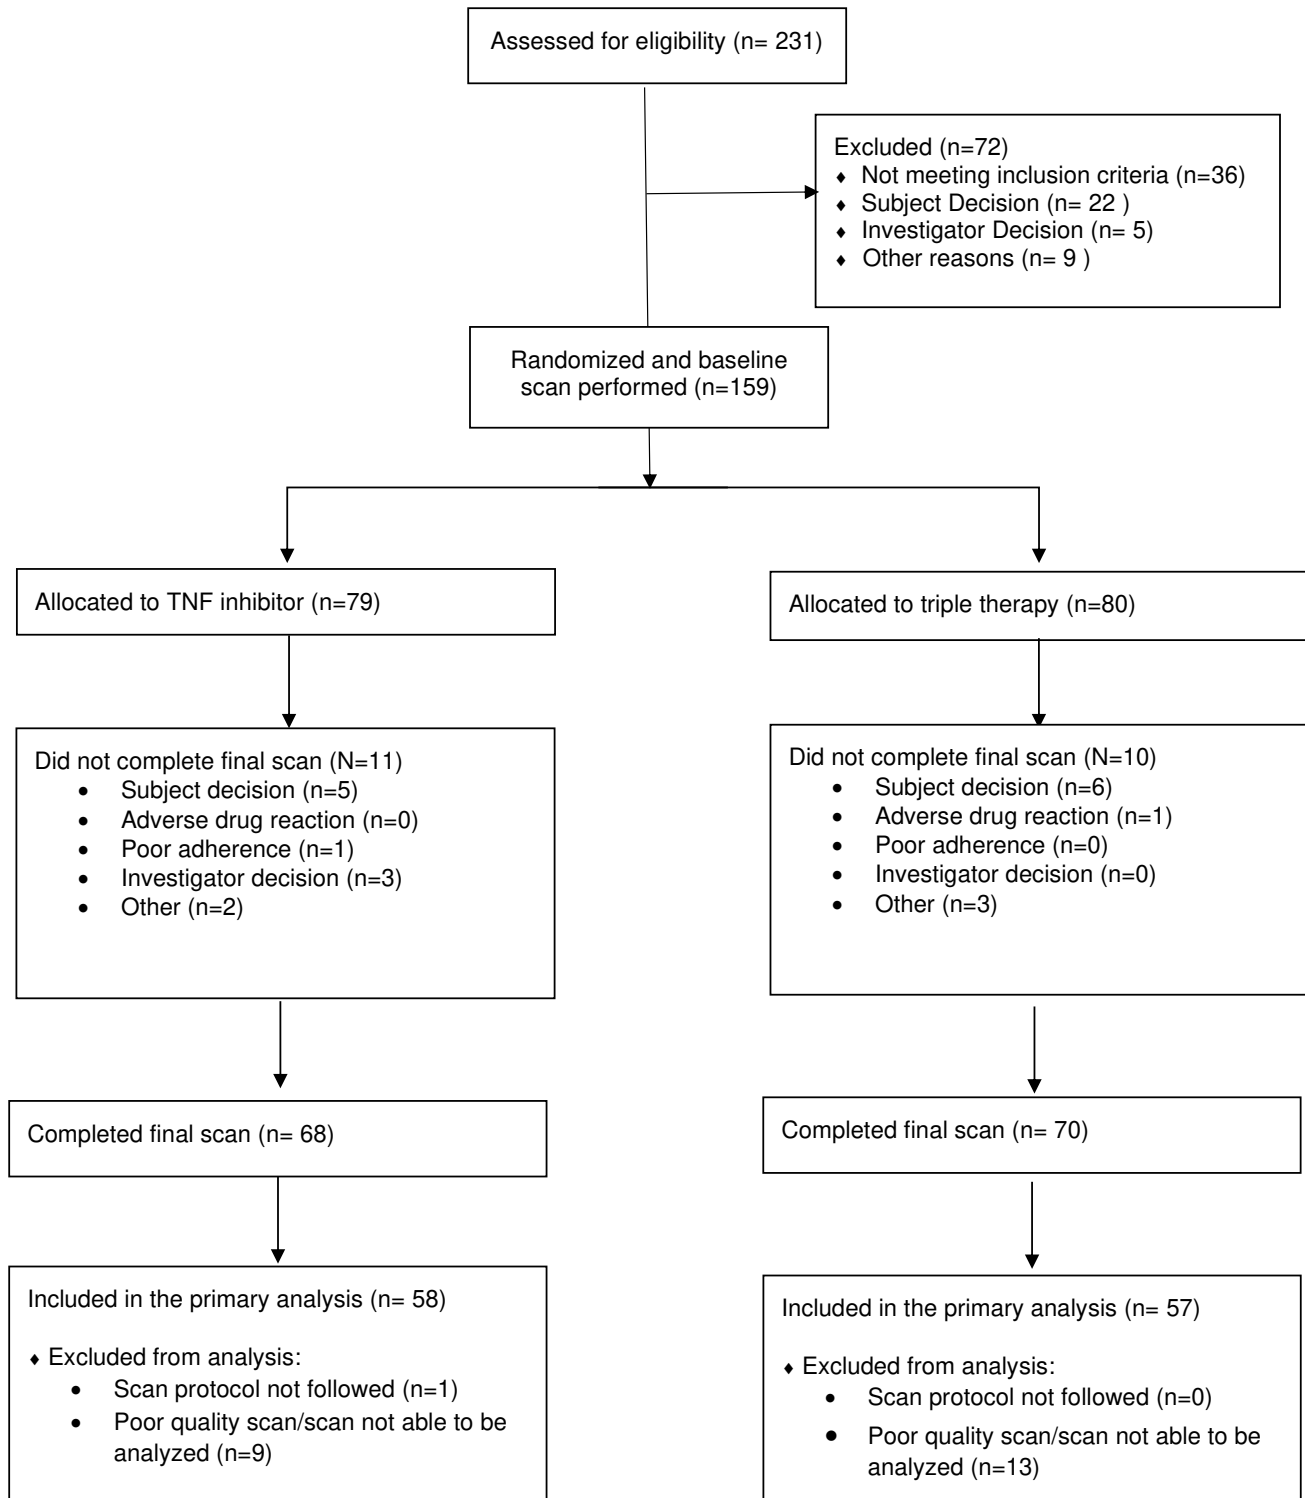

**Supplementary Table 3: Main Outcome Results Based on Different Definitions of Adherence**

| Compliance definitions                                                        | Number of compliant subjects by each definition |                | Difference in differences in TBR (95% CI) | p-value |
|-------------------------------------------------------------------------------|-------------------------------------------------|----------------|-------------------------------------------|---------|
|                                                                               | TNFi                                            | Triple therapy |                                           |         |
| >80% on all pills                                                             | 29                                              | 25             | 0.11 (-0.10, 0.31)                        | 0.30    |
| >80% on all pills excluding methotrexate                                      | 36                                              | 29             | 0.03 (-0.20, 0.26)                        | 0.80    |
| >80% on all pills or compliant at all visits according to site reports*       | 43                                              | 35             | 0.04 (-0.15, 0.23)                        | 0.68    |
| >80% on all pills or compliant at all but one visit according to site reports | 49                                              | 42             | 0.01 (-0.17, 0.18)                        | 0.93    |

\*In addition to providing pills counts at each visit, sites were asked to report if the subject's compliance was "good" at each visit.

**Supplemental Figure 3: Disease Activity by Treatment Group at Baseline, 6 weeks, 8 weeks, and Final Follow-up**

Figures demonstrate the mean change from baseline across the DAS28-CRP (Panel A), hsCRP (Panel B), swollen joint count (Panel C), tender joint count (Panel D), and patient global (Panel E). The blue line indicates the triple therapy group and the red line indicates the TNFi group. The p-values were estimated in ANCOVA models comparing change from final to baseline assessment. P-values (to be inserted on the figure): DAS28 – 0.19; hsCRP – <0.001; TJC – 0.24; SJC – 0.88; Global Assessment – 0.71.



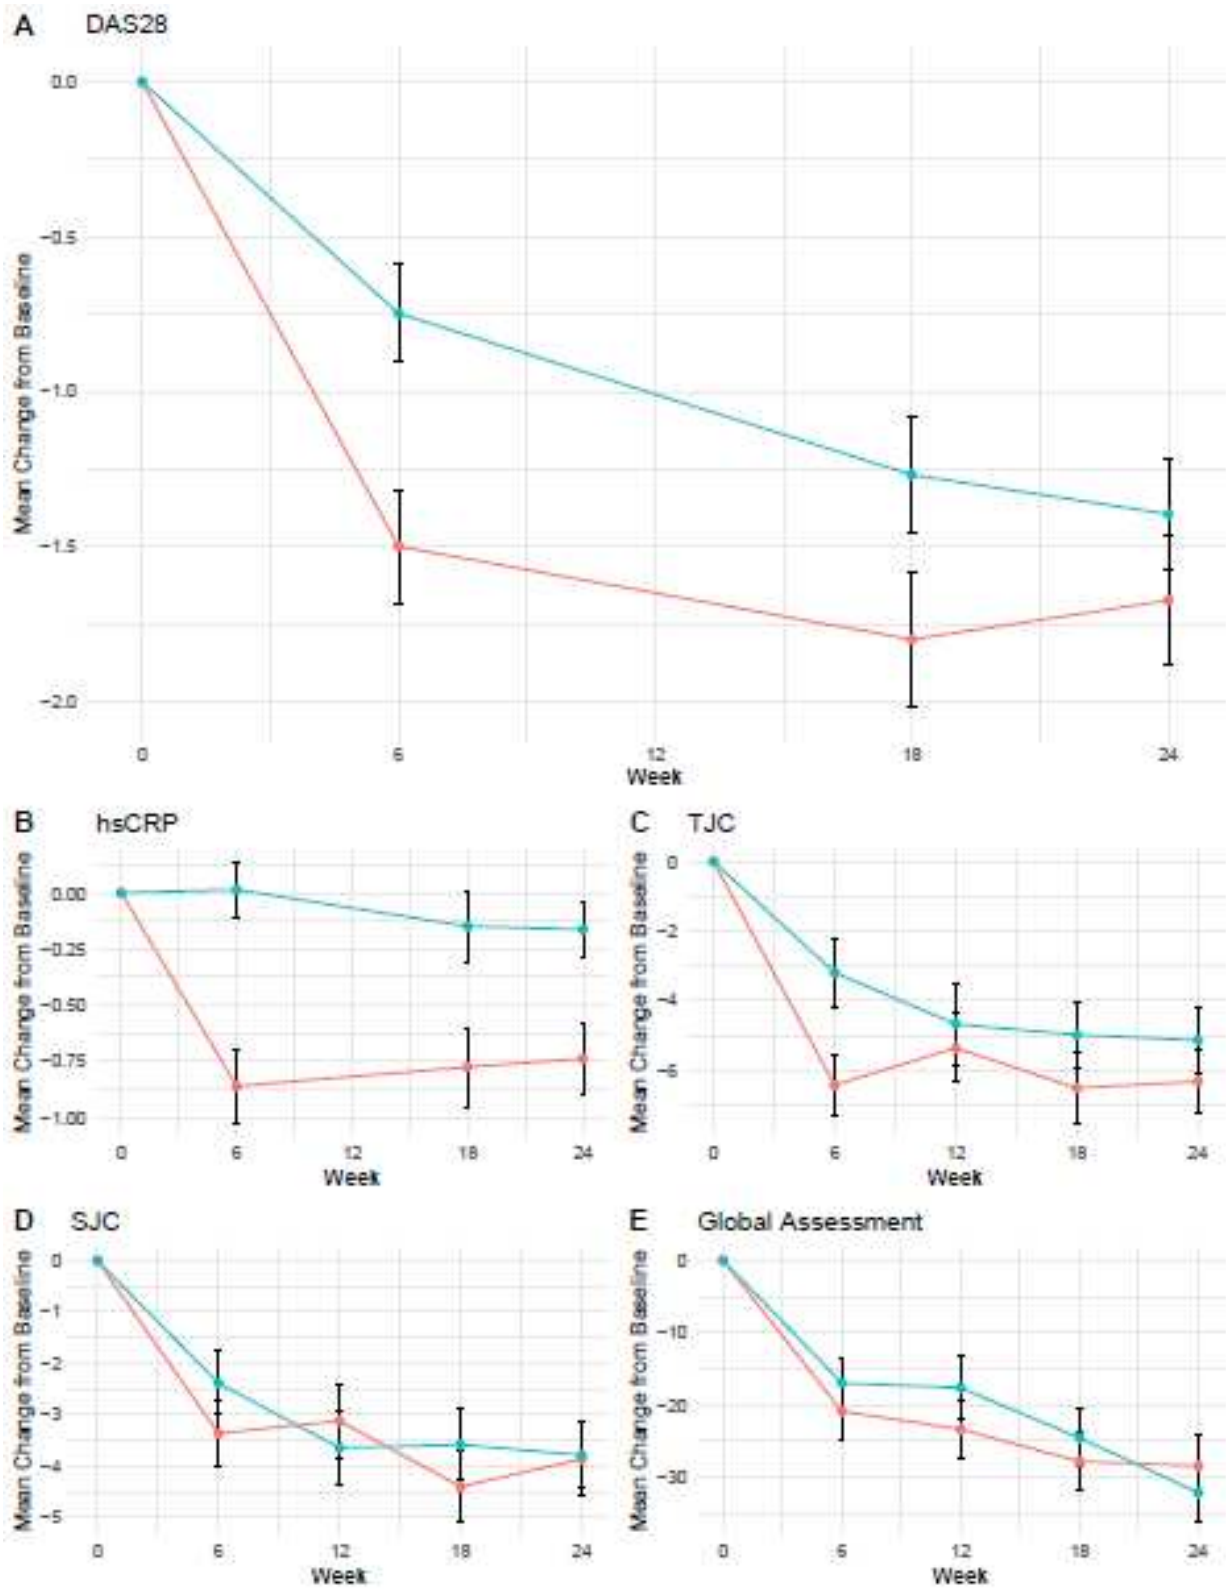

**Supplementary Table 4: Simple Mediation Analyses**

|                                                               | N  | $\beta$ (95% CI)    |
|---------------------------------------------------------------|----|---------------------|
| Triple therapy remaining in moderate to high disease activity | 34 | Ref                 |
| Triple therapy achieving low disease activity or remission    | 23 | -0.11 (-0.36, 0.14) |
| TNFi + MTX remaining in moderate to high disease activity     | 21 | 0.03 (-0.23, 0.30)  |
| TNFi + MTX achieving low disease activity or remission        | 36 | -0.18 (-0.41, 0.05) |

We divided participants into four groups according to randomized treatment assignment and whether they achieved low disease activity or remission ( $\text{DAS28-CRP} \leq 3.2$ ) versus remaining at moderate-high disease activity ( $\text{DAS28-CRP} > 3.2$ ); this was defined by the DAS28-CRP at 18 weeks. We used an ANCOVA model estimating the change in index vessel TBR as a function of the baseline TBR, randomization strata, the four groups combining information on treatment assignment and treatment response, a term for length of time between baseline and follow-up FDG-PET/CT scan, and the following potential confounders as measured at baseline: age, gender, disease duration, smoking status, serologic status, and body mass index.

**Supplementary Table 5: Glucocorticoid Use at Baseline and During Follow-Up, Percentages**

|                       | Screening | Week 6 | Week 12 | Week 18 | Week 24 |
|-----------------------|-----------|--------|---------|---------|---------|
| Triple therapy (N=57) | 31.6%     | 38.6%  | 37.5%   | 36.4%   | 37.5%   |
| TNFi (N=58)           | 34.5%     | 29.3%  | 31.0%   | 24.1%   | 24.1%   |
